# Supplementary material
Source: MDPI journal article supplement (https://www.mdpi.com/2073-445X/13/4/454)

Figure S1: Number of elderships with mismatched ES in Vilnius 2000 and 2020.

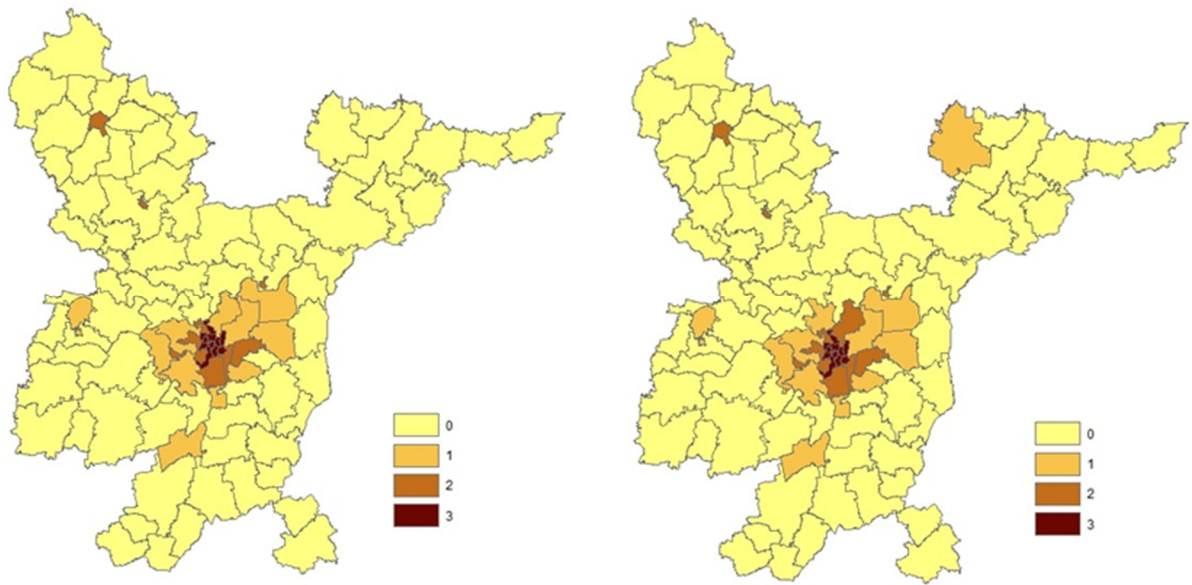

Figure S2. Influence of urban and forest land ratios on ecological supply-demand ratio (ESDR) in Vilnius in 2000 and 2020.

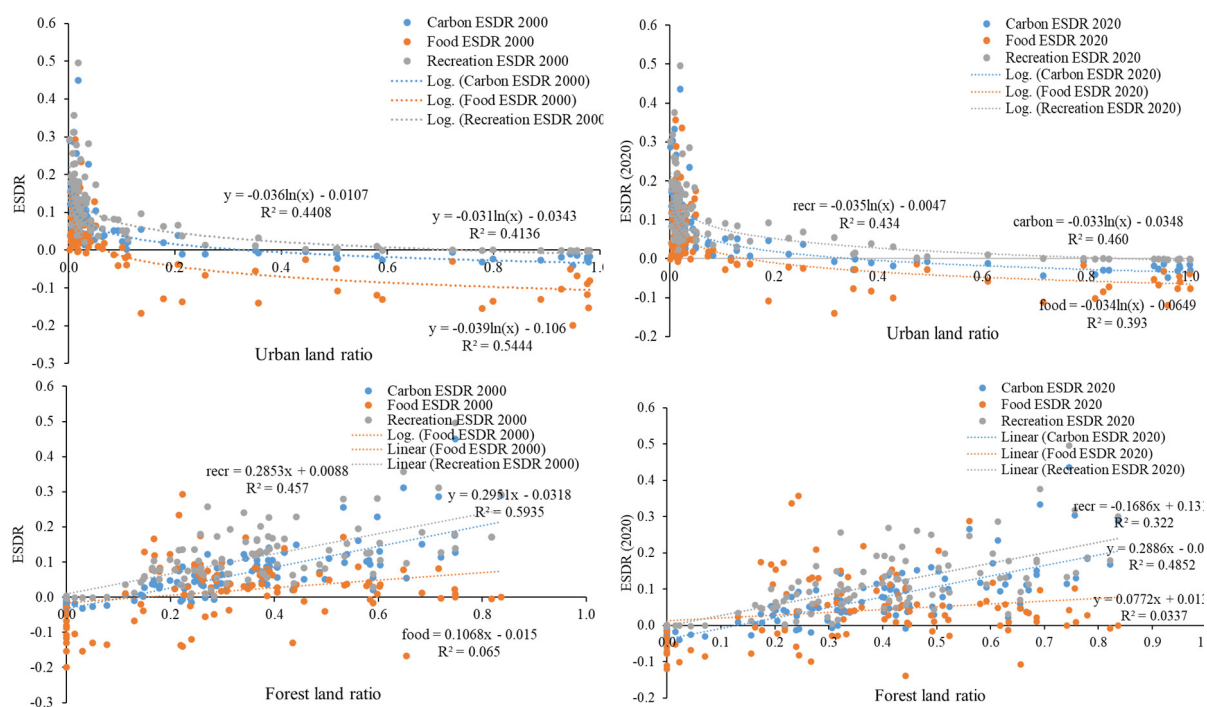

Supplement: s1 [file s1]
